# Supplementary material
Source: publisher figshare collection journal article supplement (https://brill.figshare.com/ndownloader/files/39192179)
Supplement: Supplementary file 1 [file 39192179]

## Sheet: Table S1
Supplementary table S1. List of the analysed samples with sample number, species identification, family, locality, date, collector, repository number, and NCBI accession numbers. Sequences obtained in this study are in bold. IRD (Institute de Recherche pour le Développement), KAUST (King Abdullah University of Science and Technology), UNIMIB (University of Milano-Bicocca), TO (Tara Ocean Expediti…
Ref/No.	Genus	Species	Family	Locality	Date	Collector	Skeleton repository	Microstructurally analysed fragment repository	COI	12S rRNA	16S rRNA	COI-12S rRNA-16S rRNA tree
HS3588	Fimbriaphyllia	divisa	Euphylliidae	New Caledonia	2015-09-29	F. Benzoni	IRD HS3588		OQ301694	OQ303739	OQ301761	yes
HS3683	Fimbriaphyllia	divisa	Euphylliidae	New Caledonia	2015-10-02	F. Benzoni	IRD HS3683			OQ303740	OQ301762	yes
HS3783	Galaxea	horrescens	Euphylliidae	New Caledonia	2015-10-06	F. Benzoni	IRD HS3783			OQ303741	OQ301763	yes
HS4008	Euphyllia	cristata	Euphylliidae	New Caledonia	2015-11-10	F. Benzoni	IRD HS4008		OQ301695	OQ303742	OQ301764	yes
HS4121	Galaxea	horrescens	Euphylliidae	New Caledonia	2015-11-16	F. Benzoni	IRD HS4121			OQ303743	OQ301765	yes
MA101506	Euphyllia	glabrescens	Euphylliidae	Maldives	2015-10-01	S. Montano	UNIMIB MA101506		OQ301696	OQ303744	OQ301766	yes
MU193	Galaxea	fascicularis	Euphylliidae	Yemen, Gulf of Aden	2007-03-20	F. Benzoni	UNIMIB MU193		OQ301697	OQ303745	OQ301767	yes
NC651/HS1768	Coeloseris	mayeri	Euphylliidae	New Caledonia	2007-11-01	F. Benzoni	IRD HS1768		OQ301698	OQ303746	OQ301769	yes
NC846/HS2895	Galaxea	paucisepta	Euphylliidae	New Caledonia	2011-03-22	F. Benzoni	IRD HS2895	ZPAL H.25/149	OQ301699	OQ303747		yes
NC865/HS2914	Galaxea	paucisepta	Euphylliidae	New Caledonia	2011-03-22	F. Benzoni	IRD HS2914			OQ303748	OQ301770	yes
PFB127	Coeloseris	mayeri	Euphylliidae	Papua New Guinea	2012-11-12	F. Benzoni	UNIMIB PFB127		OQ301700	OQ303749	OQ301771	yes
PFB435	Euphyllia	glabrescens	Euphylliidae	Papua New Guinea	2014-08-11	F. Benzoni	UNIMIB PFB435	ZPAL H.25/151	OQ301701	OQ303750		yes
PFB478	Galaxea	horrescens	Euphylliidae	Papua New Guinea	2014-08-12	F. Benzoni	UNIMIB PFB478	ZPAL H.25/147	OQ301702	OQ303751	OQ301773	yes
PFB623	Galaxea	fascicularis	Euphylliidae	Papua New Guinea	2014-08-15	F. Benzoni	UNIMIB PFB623		OQ301703	OQ303752		yes
PFB634	Euphyllia	glabrescens	Euphylliidae	Papua New Guinea	2014-08-16	F. Benzoni	UNIMIB PFB634		OQ301704	OQ303753	OQ301774	yes
PFB688	Euphyllia	cristata	Euphylliidae	Papua New Guinea	2014-08-18	F. Benzoni	UNIMIB PFB688		OQ301706	OQ303754	OQ301776	yes
PFB756	Fimbriaphyllia	ancora	Euphylliidae	Papua New Guinea	2014-08-19	F. Benzoni	UNIMIB PFB756			OQ303755	OQ301777	yes
PFB808	Galaxea	astreata	Euphylliidae	Papua New Guinea	2014-08-22	F. Benzoni	UNIMIB PFB808	ZPAL H.25/145	OQ301707	OQ303756	OQ301778	yes
PFB825	Euphyllia	cristata	Euphylliidae	Papua New Guinea	2014-08-24	F. Benzoni	UNIMIB PFB825	ZPAL H.25/152		OQ303757		yes
SA0001	Gyrosmilia	interrupta	Euphylliidae	Saudi Arabia, Red Sea	2012-03-02	F. Benzoni	KAUST SA0001		OQ301708	OQ303758	OQ301779	yes
SA0080	Gyrosmilia	interrupta	Euphylliidae	Saudi Arabia, Red Sea	2012-03-05	F. Benzoni	KAUST SA0080	ZPAL H.25/150	OQ301709	OQ303759		yes
SA0203	Gyrosmilia	interrupta	Euphylliidae	Saudi Arabia, Red Sea	2012-03-07	F. Benzoni	KAUST SA0203		OQ301710	OQ303760	OQ301780	yes
SA0212	Galaxea	fascicularis	Euphylliidae	Saudi Arabia, Red Sea	2012-03-07	F. Benzoni	KAUST SA0212	ZPAL H.25/146		OQ303761		yes
SA1212	Galaxea	astreata	Euphylliidae	Saudi Arabia, Red Sea	2013-10-08	F. Benzoni	KAUST SA1212	ZPAL H.25/144		OQ303762		yes
SA1807	Fimbriaphyllia	paradivisa	Euphylliidae	Saudi Arabia, Red Sea	2013-10-26	F. Benzoni	KAUST SA1807	ZPAL H.25/155		OQ303763		yes
SA1809	Fimbriaphyllia	paradivisa	Euphylliidae	Saudi Arabia, Red Sea	2013-10-26	F. Benzoni	KAUST SA1809			OQ303764	OQ301782	yes
SO096	Galaxea	astreata	Euphylliidae	Yemen, Socotra Island	2010-03-16	F. Benzoni	UNIMIB SO096		OQ301711	OQ303765	OQ301783	yes
DJ324	Galaxea	fascicularis	Euphylliidae	Djibouti, Gulf of Tadjoura	2010-02-09	F. Benzoni	UNIMIB-TO DJ324		OQ301692		OQ301759	yes
HS3411	Euphyllia	glabrescens	Euphylliidae	New Caledonia		F. Benzoni	IRD HS3411		OQ301693		OQ301760	yes
MY103	Fimbriaphyllia	divisa	Euphylliidae	Mayotte Island	2010-06-05	F. Benzoni	UNIMIB-TO MY103	ZPAL H.25/154			OQ301768	yes
PFB166	Galaxea	acrhelia	Euphylliidae	Papua New Guinea	2012-11-13	F. Benzoni	UNIMIB PFB166	ZPAL H.25/148			OQ301772	yes
PFB635	Fimbriaphyllia	ancora	Euphylliidae	Papua New Guinea	2014-08-16	F. Benzoni	UNIMIB PFB635		OQ301705		OQ301775	yes
PFB804	Fimbriaphyllia	ancora	Euphylliidae	Papua New Guinea	2014-08-22	F. Benzoni	UNIMIB PFB804	ZPAL H.25/153
SA1808	Fimbriaphyllia	paradivisa	Euphylliidae	Saudi Arabia, Red Sea	2013-10-26	F. Benzoni	KAUST SA1808				OQ301781	yes

## Sheet: Table S2
Supplementary table S2. List of specie and relative sequences downloaded from GenBank and used for the molecular phylogenetic analyses in this study.
Genus	Species	Family	COI	12S rRNA	16S rRNA	COI-12S rRNA-16S rRNA tree
Euphyllia	glabrescens	Euphylliidae	AB441206
Euphyllia	glabrescens	Euphylliidae	AB441207
Euphyllia	glabrescens	Euphylliidae	HQ420830
Euphyllia	glabrescens	Euphylliidae	KU845696
Fimbriaphyllia	ancora	Euphylliidae	AB441204
Fimbriaphyllia	ancora	Euphylliidae	AB441205
Fimbriaphyllia	ancora	Euphylliidae	JF825139	JF825139	JF825139	yes
Fimbriaphyllia	ancora	Euphylliidae			AF265598
Fimbriaphyllia	ancora	Euphylliidae		EF597097
Fimbriaphyllia	ancora	Euphylliidae		EF597098
Fimbriaphyllia	ancora	Euphylliidae	KU845695
Fimbriaphyllia	divisa	Euphylliidae	AB441203
Fimbriaphyllia	divisa	Euphylliidae	KU845697
Ctenella	chagius	Euphylliidae	AB441208			yes
Galaxea	astreata	Euphylliidae	JQ920457
Galaxea	astreata	Euphylliidae			JQ347819
Galaxea	astreata	Euphylliidae		AF333056
Galaxea	fascicularis	Euphylliidae	AB441201
Galaxea	fascicularis	Euphylliidae	AB441202
Galaxea	fascicularis	Euphylliidae	HQ420829
Galaxea	fascicularis	Euphylliidae	JQ920441
Galaxea	fascicularis	Euphylliidae	KU159433	KU159433	KU159433	yes
Galaxea	fascicularis	Euphylliidae			L76006
Galaxea	horrescens	Euphylliidae			L75994
Galaxea	horrescens	Euphylliidae		EF597096
Galaxea	sp.	Euphylliidae	KY887484
Galaxea	sp.	Euphylliidae			JQ347820
Fungiacyathus	stephanus	Fungiacyathidae	JF825138	JF825138	JF825138	yes
Tubastraea	coccinea	Dendrophylliidae	MK959039	MK959039	MK959039	yes
Turbinaria	peltata	Dendrophylliidae	KJ725201	KJ725201	KJ725201	yes
Dendrophyllia	minuscula	Dendrophylliidae	OL634845	OL634845	OL634845	yes
Goniopora	planulata	Poritidae	OL372279	OL372279	OL372279	yes
Porites	porites	Poritidae	DQ643837	DQ643837	DQ643837	yes
Pachyseris	sp.	incertae sedis	KY888878	EF597085		yes
Pachyseris	speciosa	incertae sedis	AB441222			yes
Acropora	horrida	Acroporidae	KF448530	KF448530	KF448530	yes
Alveopora	japonica	Acroporidae	MG851913	MG851913	MG851913	yes
Anacropora	matthai	Acroporidae	AY903295	AY903295	AY903295	yes
Astreopora	explanata	Acroporidae	KJ634269	KJ634269	KJ634269	yes
Isopora	palifera	Acroporidae	KJ634270	KJ634270	KJ634270	yes
Montipora	cactus	Acroporidae	AY903296	AY903296	AY903296	yes
Pavona	cactus	Agariciidae	AB441216		AF550370	yes
Gardineroseris	planulata	Agariciidae	AB441218	EF597084		yes
Agaricia	humilis	Agariciidae	DQ643831	DQ643831	DQ643831	yes
Pseudosiderastrea	formosa	Siderastreidae	KP260633	KP260633	KP260633	yes
Siderastrea	radians	Siderastreidae	DQ643838	DQ643838	DQ643838	yes
Discosoma	nummiforme	Corallimorpharia	KP938434	KP938434	KP938434	yes

## Sheet: Table S3
Supplementary table S3. List of the 23 morphological characters and states analysed in this study.
No.	Type	Character	States	Parsimony mode
1	Macromorphology	Intracalicular budding	0 = absent	Unordered
			1 = present
2	Macromorphology	Extracalicular budding	0 = absent	Unordered
			1 = present
3	Macromorphology	Polymorphism	0 = absent	Unordered
			1 = present
4	Macromorphology	Corallite integration	0 = discrete (1–3 centres)	Ordered
			1 = uni- or multiserial
			2 = organically united
5	Macromorphology	Coenosteum amount	0 = fused walls	Ordered
			1 = limited (includes double wall)
			2 = moderate (< corallite diameter)
			3 = extensive (≥ corallite diameter)
			4 = phaceloid
6	Macromorphology	Coenosteum structure	0 = costate	Unordered
			1 = spinose
			2 = vescicular
7	Macromorphology	Calice width	0 = small (< 4 mm)	Ordered
			1 = medium (4–15 mm)
			2 = large (> 15 mm)
8	Macromorphology	Calice relief	0 = low (< 3 mm)	Ordered
			1 = medium (3–6 mm)
			2 = high (> 6 mm)
9	Macromorphology	Continuity of costosepta	0 = not confluent	Unordered
			1 = confluent
10	Macromorphology	Number of septa	0 = < 3 cycles (< 24)	Ordered
			1 = 3 cycles (24–36)
			2 = ≥ 4 cycles (≥ 48)
11	Macromorphology	Free septa	0 = absent	Ordered
			1 = irregular
			2 = regular
12	Macromorphology	Septa spacing (per 5 mm)	0 = < 6	Ordered
			1 = 6–11
			2 = > 11
13	Macromorphology	Relative costosepta thickness	0 = unequal	Ordered
			1 = slightly unequal
			2 = equal
14	Macromorphology	Columella linkage	0 = absent	Ordered
			1 = discontinuous (lamellar linkage)
			2 = continuous (trabecular linkage)
15	Macromorphology	Columella structure	0 = lamellar	Unordered
			1 = trabecular, compact (1–3 threads)
			2 = trabecular, spongy (> 3 threads)
			3 = reduced to inner septa margin processes
16	Macromorphology	Columella size (relative to calice width)	0 = < 1/4	Unordered
			1 = ≥ 1/4
17	Macromorphology	Development of paliform lobes	0 = absent	Ordered
			1 = weak or moderate
			2 = well developed
18	Macromorphology	Endotheca	0 = sparse	Ordered
			1 = low−moderate (tabular)
			2 = abundant (vesicular)
19	Micromorphology/microstructure	Microtexture (septal faces)	0 = no distinct shingles	Unordered
			1 = shingles
			2 = shingles arranged into unique, meandering "persian lamb fur" pattern
			3 = granular/occasional shingles
			4 = delicately granular
			5 = delicately grainy; low but pointed granulae arranged in rows parallel to septal margin
			6 = small-sized shingles
20	Micromorphology/microstructure	Thickening deposits – microstructure	0 = bundles of fibers not well delineated, perpendicular to septal surface	Unordered
			1 = bundles of fibers typically perpendicular to septal surface
			2 = bundles of fibers perpendicular/slightly oblique to the septal surface
			3 = well delineated bundles of fibers, perpendicular/slightly oblique to the septal surface
			4 = fibers arranged into snake-like bundles (consequence of continuous growth of shingles)
			5 = in some (axial) septa regions fibers arranged into elongated bundles (consequence of continuous growth of shingles)
21	Micromorphology/microstructure	Rapid accretion deposits – septal	0 = closely spaced	Unordered
			1 = closely spaced (zig-zag mid-septal zone)
			2 = closely spaced, often not well delineated RAD
22	Polyp structure	Tentacles at daytime	0 = retracted	Ordered
			1 = partially/fully extended
			2 = fully extended
23	Polyp structure	Tentacle shape	0 = simplex	Unordered
			1 = complex

## Sheet: Table S4
Supplementary table S4. List of specimens analysed from a morphological point of view and their character states for the 23 investigated morphological characters. NA = not applicable.
Family	Genus	Species	Specimen repository	Microstructurally analysed fragment repository	Status	Identifier/Collector	Year	Locality	Intracalicular budding	Extracalicular budding	Polymorphism	Corallite integration	Coenosteum amount	Coenosteum structure	Calice width	Calice relief	Continuity of costosepta	Number of septa	Free septa	Septa spacing (per 5 mm)	Relative costosepta thickness	Columella linkage	Columella structure	Columella size (relative to calice width)	Development of paliform lobes	Endotheca	Microtexture (septal faces)	Thickening deposits – microstructure	Rapid accretion deposits – septal	Tentacles at daytime	Tentacle shape
Euphylliidae	Coeloseris	mayeri	USNM 68296		syntype	Vaughan	1918	Murray Island, Australia	present	present	absent	discrete	fused walls	NA	small	medium	NA	3 cycles	regular	narrow	equal	NA	NA	NA	absent	abundant	delicately granular	well delineated bundles of fibers, perpendicular/slightly oblique to the septal surface	closely spaced	retracted	simple
Euphylliidae	Coeloseris	mayeri	UNIMIB PFB127		nontype	Benzoni	2016	Papua New Guinea	present	present	absent	discrete	fused walls	NA	small	medium	NA	3 cycles	regular	narrow	equal	NA	NA	NA	absent	abundant				retracted	simple
Euphylliidae	Ctenella	chagius	BMNH 1928.3.1.61		holotype	Matthai/Garinder	1928	Egmont Chagis	present	present	absent	uni- or multi serial	fused walls	NA	medium	medium	NA	≥ 4 cycles	regular	medium	equal	continuous	lamellar	< 1/4	absent	abundant				partially/fully extended	simple
Euphylliidae	Euphyllia	cristata	UNIMIB PFB825	ZPAL H.25/152	nontype	Benzoni	2014	Papua New Guinea	present	present	absent	discrete	phaceloid	NA	large	high	NA	≥ 4 cycles	regular	wide	unequal	absent	reduced to inner septa margin processes	< 1/4	absent	abundant	no distinct shingles	bundles of fibers not well delineated, perpendicular to septal surface	closely spaced (zig-zag mid-septal zone)	fully extended	simple
Euphylliidae	Euphyllia	glabrescens	UNIMIB PFB435	ZPAL H.25/151	nontype	Benzoni	2014	Papua New Guinea	present	present	absent	discrete	phaceloid	NA	large	high	NA	≥ 4 cycles	regular	wide	unequal	absent	reduced to inner septa margin processes	< 1/4	absent	abundant	small-sized shingles	bundles of fibers typically perpendicular to septal surface	closely spaced (zig-zag mid-septal zone)	fully extended	simple
Euphylliidae	Fimbriaphyllia	ancora	UNIMIB PFB804	ZPAL H.25/153	nontype	Benzoni	2014	Papua New Guinea	present	present	absent	discrete	phaceloid	NA	large	high	NA	≥ 4 cycles	regular	wide	unequal	NA	NA	NA	absent	abundant	delicately grainy; low but pointed granulae arranged in rows parallel to septal margin	bundles of fibers not well delineated, perpendicular to septal surface	closely spaced (zig-zag mid-septal zone)	fully extended	complex
Euphylliidae	Fimbriaphyllia	divisa	UNIMIB-TO MY103	ZPAL H.25/154	nontype	Benzoni	2010	Mayotte Island	present	present	absent	discrete	phaceloid	NA	large	high	NA	≥ 4 cycles	regular	wide	unequal	NA	NA	NA	absent	abundant	delicately grainy; low but pointed granulae arranged in rows parallel to septal margin	bundles of fibers not well delineated, perpendicular to septal surface	closely spaced (zig-zag mid-septal zone)	fully extended	complex
Euphylliidae	Fimbriaphyllia	paradivisa	KAUST SA1807	ZPAL H.25/155	nontype	Benzoni	2014	Saudi Arabia, Red Sea	present	present	absent	discrete	phaceloid	NA	large	high	NA	≥ 4 cycles	regular	wide	unequal	NA	NA	NA	absent	abundant	delicately grainy; low but pointed granulae arranged in rows parallel to septal margin	bundles of fibers not well delineated, perpendicular to septal surface	closely spaced (zig-zag mid-septal zone)	fully extended	complex
Euphylliidae	Galaxea	acrhelia	UNIMIB PFB166	ZPAL H.25/148	nontype	Benzoni	2012	Papua New Guinea	absent	present	absent	discrete	extensive	vesicular	medium	high	mostly not confluent	3 cycles	regular	medium	unequal	absent	trabecular, compact	≥ 1/4	absent	abundant	shingles arranged into unique, meandering "persian lamb fur" pattern	In some (axial) septa regions fibers arranged into elongated bundles (consequence of continuous growth of shingles)	closely spaced, often not well delineated RAD	partially/fully extended	simple
Euphylliidae	Galaxea	astreata	MNHN IK-2010-422		holotype	Lamarck	1816	Indian Ocean	absent	present	absent	discrete	extensive	vesicular	medium	medium	mostly not confluent	3 cycles	regular	medium	unequal	absent	trabecular, compact	≥ 1/4	absent	abundant	shingles arranged into unique, meandering "persian lamb fur" pattern	In some (axial) septa regions fibers arranged into elongated bundles (consequence of continuous growth of shingles)	closely spaced, often not well delineated RAD	partially/fully extended	simple
Euphylliidae	Galaxea	astreata	UNIMIBPFB808	ZPAL H.25/145	nontype	Benzoni	2014	Papua New Guinea	absent	present	absent	discrete	extensive	vesicular	medium	medium	mostly not confluent	3 cycles	regular	medium	unequal	absent	trabecular, compact	≥ 1/4	absent	abundant	shingles arranged into unique, meandering "persian lamb fur" pattern	In some (axial) septa regions fibers arranged into elongated bundles (consequence of continuous growth of shingles)	closely spaced, often not well delineated RAD	partially/fully extended	simple
Euphylliidae	Galaxea	astreata	KAUST SA1212	ZPAL H.25/144	nontype	Benzoni	2013	Saudi Arabia, Red Sea	absent	present	absent	discrete	extensive	vesicular	medium	medium	mostly not confluent	3 cycles	regular	medium	unequal	absent	trabecular, compact	≥ 1/4	absent	abundant	shingles arranged into unique, meandering "persian lamb fur" pattern	In some (axial) septa regions fibers arranged into elongated bundles (consequence of continuous growth of shingles)	closely spaced, often not well delineated RAD	partially/fully extended	simple
Euphylliidae	Galaxea	fascicularis	KAUST SA0212	ZPAL H.25/146	nontype	Benzoni	2013	Saudi Arabia, Red Sea	absent	present	absent	discrete	extensive	vesicular	medium	medium	mostly not confluent	3 cycles	regular	medium	unequal	absent	trabecular, compact	≥ 1/4	absent	abundant	shingles arranged into unique, meandering "persian lamb fur" pattern	In some (axial) septa regions fibers arranged into elongated bundles (consequence of continuous growth of shingles)	closely spaced, often not well delineated RAD	partially/fully extended	simple
Euphylliidae	Galaxea	horrescens	UNIMIB PFB478	ZPAL H.25/147	nontype	Benzoni	2014	Papua New Guinea	absent	present	absent	discrete	extensive	vesicular	medium	high	mostly not confluent	3 cycles	regular	medium	unequal	absent	trabecular, compact	≥ 1/4	absent	abundant	shingles is not clear			partially/fully extended	simple
Euphylliidae	Galaxea	paucisepta	IRD HS2895	ZPAL H.25/149	nontype	Benzoni	2011	New Caledonia	absent	present	absent	discrete	extensive	vesicular	small	medium	mostly not confluent	< 3 cycles	regular	narrow	unequal	absent	trabecular, compact	< 1/4	absent	abundant	delicately granular	bundles of fibers typically perpendicular to septal surface	closely spaced	partially/fully extended	simple
Euphylliidae	Gyrosmilia	interrupta	KAUST SA0080	ZPAL H.25/150	nontype	Benzoni	2013	Saudi Arabia, Red Sea	present	present	absent	uni- or multi serial	fused walls	NA	medium	medium	NA	≥ 4 cycles	regular	medium	equal	NA	NA	NA	absent	abundant	delicately granular	bundles of fibers not well delineated, perpendicular to septal surface	closely spaced (zig-zag mid-septal zone)	partially/fully extended	simple
incertae sedis	Pachyseris	speciosa	USNM 119		nontype	Dana	1846	East Indies	present	present	absent	uni- or multi serial	fused walls	NA	small	medium	NA	≥ 4 cycles	absent or poorly developed	narrow	equal	continuous	lamellar	< 1/4	absent	sparse	granular/occasional shingles		closely spaced	retracted	simple
incertae sedis	Pachyseris	speciosa	KAUST SA0376		nontype	Benzoni	2014	Saudi Arabia, Red Sea	present	present	absent	uni- or multi serial	fused walls	NA	small	medium	NA	≥ 4 cycles	absent or poorly developed	narrow	equal	continuous	lamellar	< 1/4	absent	sparse				retracted	simple
Acroporidae	Acropora	horrida			nontype	Montano	2015	Maldives	absent	present	present	discrete	extensive	spinose	small	medium	mostly not confluent	< 3 cycles	regular	narrow	unequal	NA	NA	NA	absent	low-moderate	shingles	Fibers arranged into snake-like bundles (consequence of continuous growth of shingles)	closely spaced	partially/fully extended	simple
Agariciidae	Gardineroseris	planulata	KAUST SA0810		nontype	Benzoni	2014	Saudi Arabia, Red Sea	present	present	absent	discrete	fused walls	NA	small	medium	NA	≥ 4 cycles	regular	narrow	slightly unequal	discontinuous	trabecular, compact	< 1/4	absent	sparse	granular/occasional shingles	bundles of fibers, perpendicular/slightly oblique to the septal surface	closely spaced	retracted	simple
Agariciidae	Pavona	cactus	KAUST SA0205		nontype	Benzoni	2014	Saudi Arabia, Red Sea	present	present	absent	organically united	extensive	costate	small	low	mostly confluent	< 3 cycles	regular	narrow	slightly unequal	discontinuous	trabecular, compact	< 1/4	absent	sparse	granular/occasional shingles	bundles of fibers, perpendicular/slightly oblique to the septal surface	closely spaced	retracted	simple
